# Supplementary material
Source: PubMed Central journal article supplement (PMC10068555)
Supplement: mmc1.pdf [file mmc1.pdf]

## **Supplemental information**

### **Impact of hybrid immunity booster**

#### **vaccination and Omicron breakthrough**

#### **infection on SARS-CoV-2 VOCs cross-neutralization**

**Edwards Pradenas, Silvia Marfil, Víctor Urrea, Macedonia Trigueros, Tetyana Pidkova, Anna Pons-Grífols, Raquel Ortiz, Carla Rovirosa, Ferran Tarrés-Freixas, Carmen Aguilar-Gurreri, Ruth Toledo, Anna Chamorro, Marc Noguera-Julian, Lourdes Mateu, Ignacio Blanco, Eulàlia Grau, Marta Massanella, Jorge Carrillo, Bonaventura Clotet, Benjamin Trinité, and Julià Blanco**

Figure S1

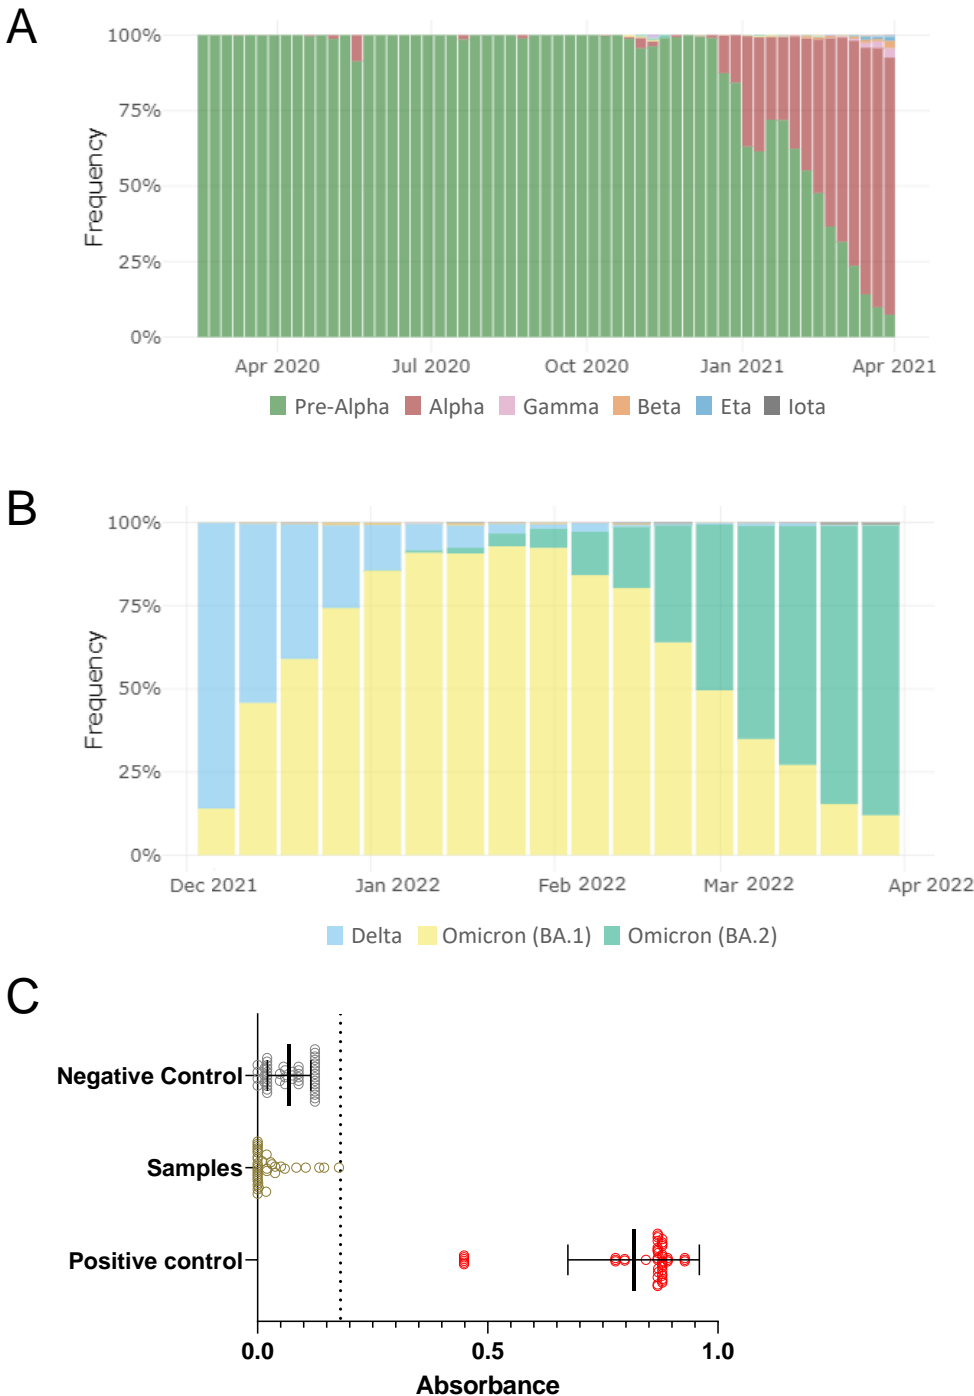

**Figure S1. Participants infection history and nucleocapsid test (related to STAR Methods: study overview and subjects).**

**A.** Temporal identification of circulating SARS-CoV-2 variants and their frequency in Catalonia Spain between March 2020 and March 2021 (source: <http://covidtag.paseq.org/>).

**B.** Temporal identification of circulating SARS-CoV-2 variants and their frequency in Catalonia Spain between December 2021 and March 2022 (source: <http://covidtag.paseq.org/>).

**C.** Anti-nucleocapsid protein IgG quantification for the status confirmation of uninfected participants. Threshold for positivity was calculated as the mean of negative controls + 2 standard deviations. Error bars indicate standard deviations. All uninfected participants were below threshold.

Figure S2

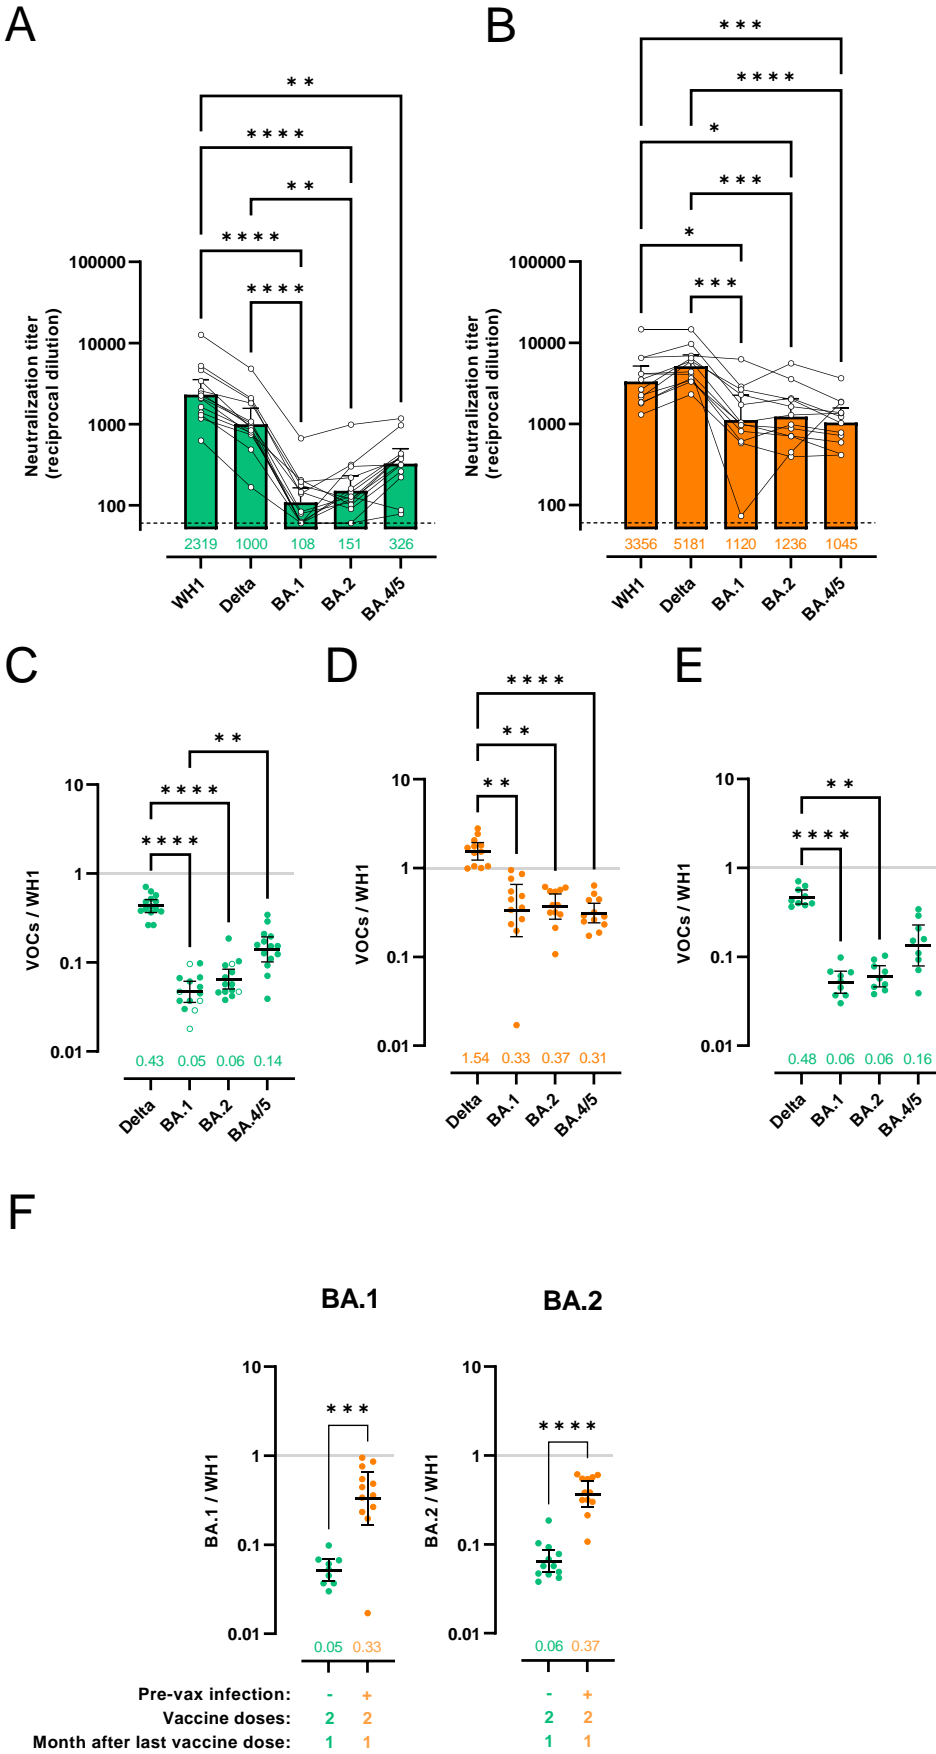

**Figure S2. Direct comparison of variants neutralizing titers and ratios within -/2/- and +/2/- groups at 1 month after last vaccine dose (Related to Figure 1).**

**A/B.** raw ID<sub>50</sub> (reciprocal dilutions) titers against the indicated variant spikes for -/2/- (A.) and +/2/- (B.) participants. Horizontal bars and numbers indicate ID<sub>50</sub> geometric means (GMT) for each variant and error bars indicate 95% confidence intervals. At the bottom are fold changes for the indicated comparisons. Only significant *p* values are indicated for comparisons between all variants (Friedman test with Dunn's multiple comparison, \* *p* < 0.05, \*\* *p* < 0.01, \*\*\* *p* < 0.001, \*\*\*\* *p* < 0.0001). Dashed lines indicate the assay lower limit of detection (60 reciprocal dilutions).

**C/D/E.** Ratio of WH1 ID50 over the indicated VOC ID50 calculated for spikes for -/2/- (C.) and +/2/- (D.) participants. E. is a reanalysis of C. excluding non-responders. Horizontal bars indicate ratio geometric means for each variant and error bars indicate 95% confidence intervals. Bottom numbers indicate fold reduction compared to WH1. Significant *p* values are indicated for comparisons between all variants (Friedman test with Dunn's multiple comparison, \*\* *p* < 0.01, \*\*\*\* *p* < 0.0001)

**F.** Re-analysis of Figure 1C for variant BA.1 and BA.2 excluding non-responders.

Figure S3

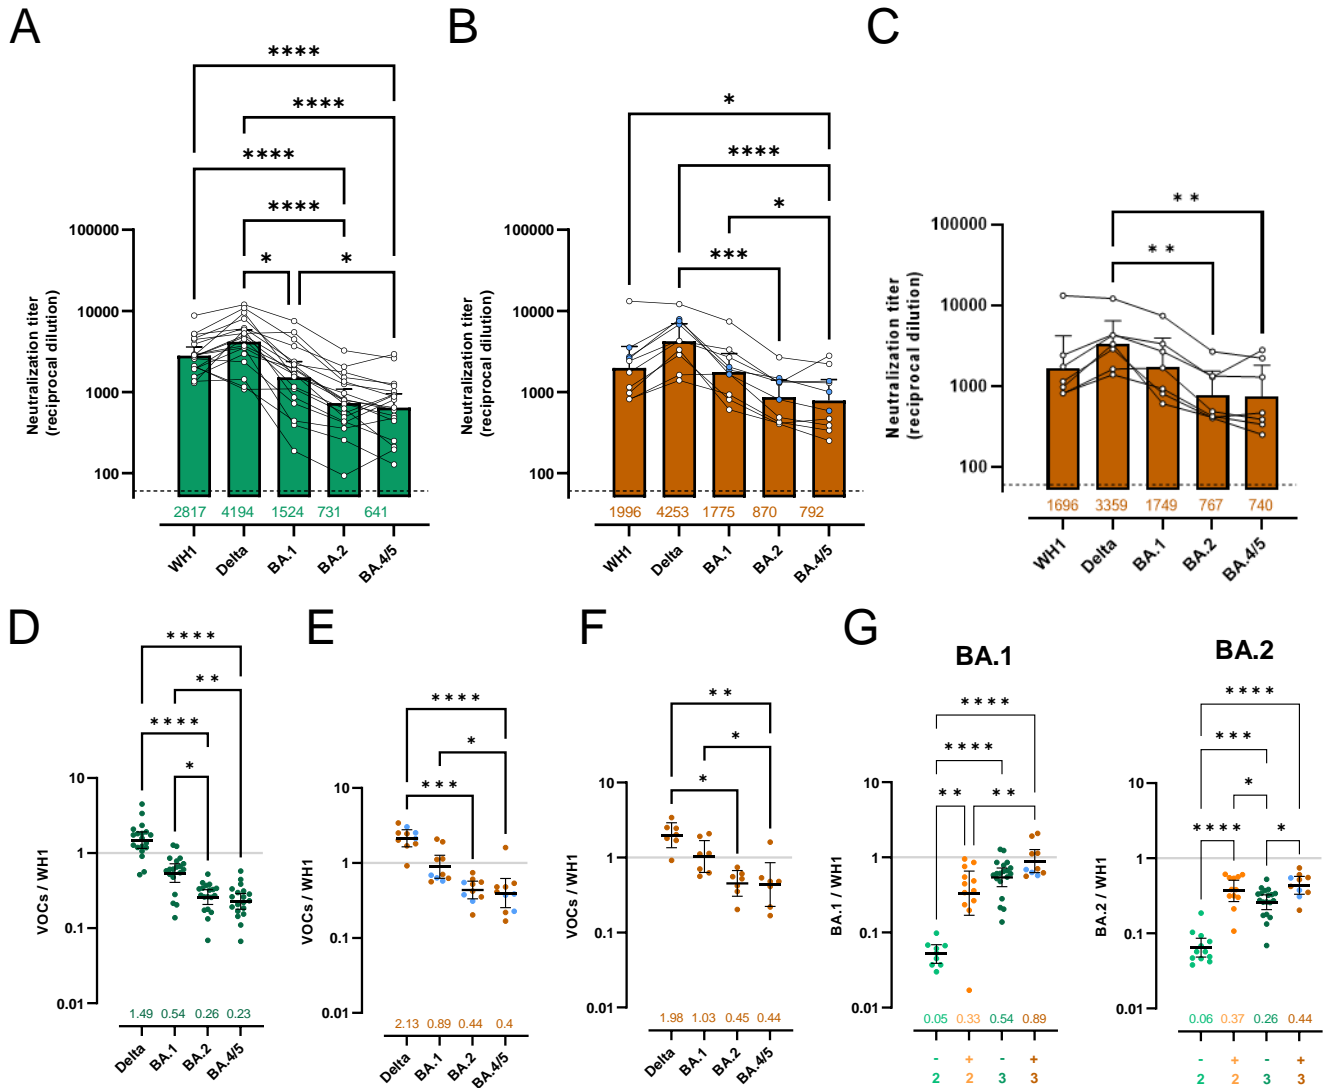

**Figure S3. Direct comparison of variants neutralizing titers and ratios within -3/- and +3/- groups (related to Figure 2).**

**A/B/C.** raw ID<sub>50</sub> (reciprocal dilutions) titers against the indicated variant spikes for -3/- (A.) and +3/- (B.) participants. C. is a reanalysis of B. excluding participants who received only 1 dose as part of full vaccine schedule (highlighted in blue in B.). Horizontal bars and numbers indicate ID<sub>50</sub> geometric means (GMT) for each variant and error bars indicate 95% confidence intervals. At the bottom are fold changes for the indicated comparisons. Significant *p* values are indicated for comparisons between all variants (Friedman test with Dunn's multiple comparison, \* *p* < 0.05, \*\*\* *p* < 0.001, \*\*\*\* *p* < 0.0001). Dashed lines indicate the assay lower limit of detection (60 reciprocal dilutions).

**D/E/F.** Ratio of WH1 ID<sub>50</sub> over the indicated VOC ID<sub>50</sub> calculated for spikes for -3/- (D.) and +3/- (E.) participants. F. is a reanalysis of E. excluding participants who received only 1 dose as part of full vaccine schedule (highlighted in blue in D.). Horizontal bars indicate ratio geometric means for each variant and error bars indicate 95% confidence intervals. Bottom numbers indicate fold reduction compared to WH1. Significant *p* values are indicated for comparisons between all variants (Friedman test with Dunn's multiple comparison, \* *p* < 0.05, \*\* *p* < 0.01, \*\*\* *p* < 0.001, \*\*\*\* *p* < 0.0001)

**G.** Re-analysis of Figure 2C for variant BA.1 and BA.2 excluding non-responders.

Figure S4

A

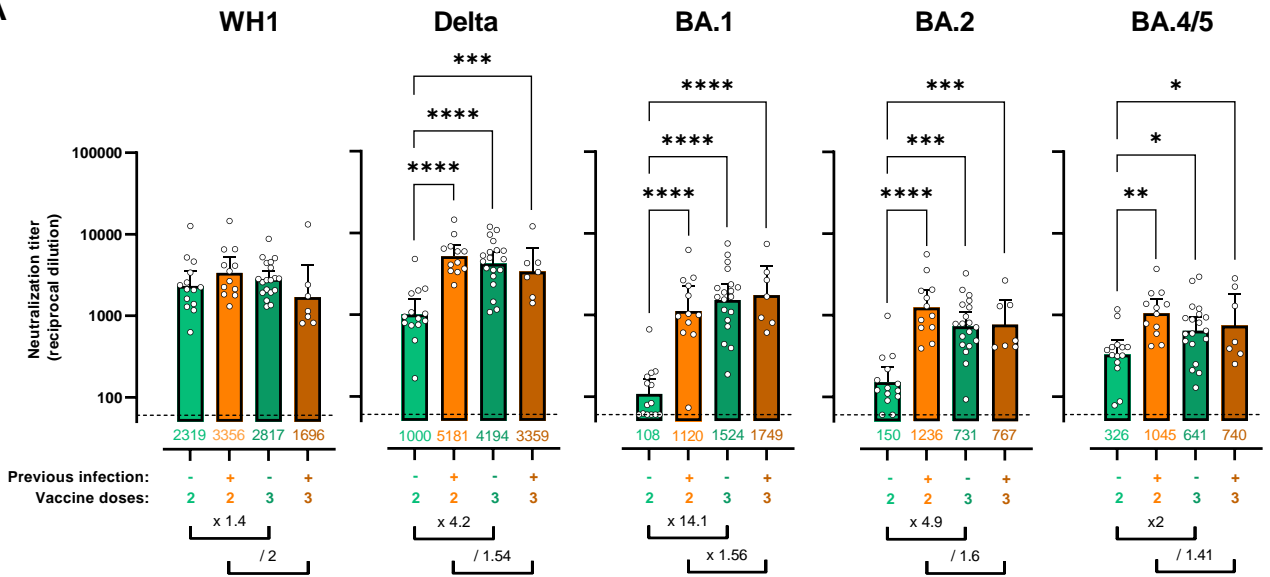

B

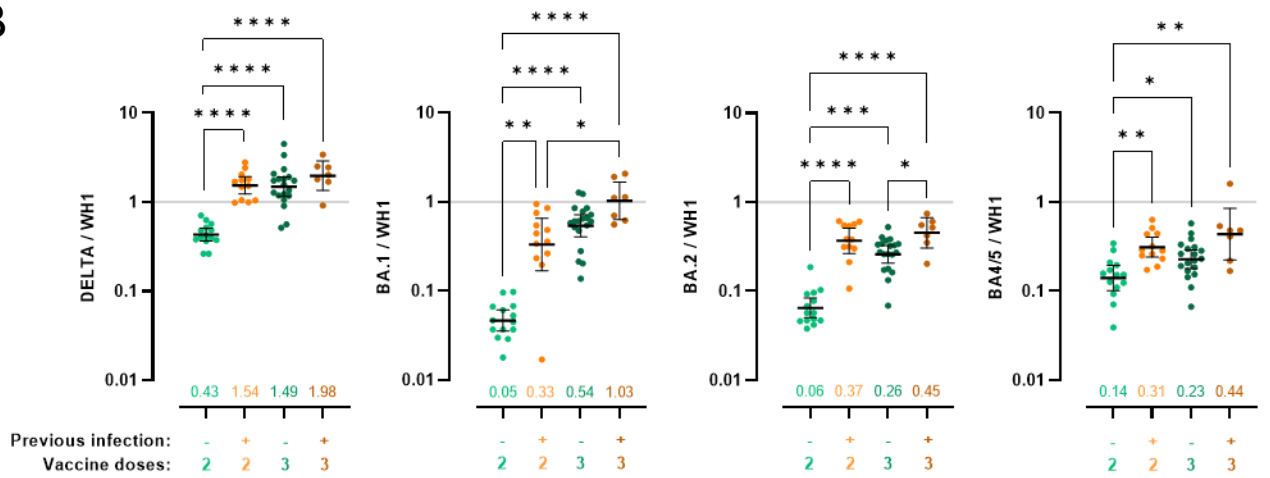

C

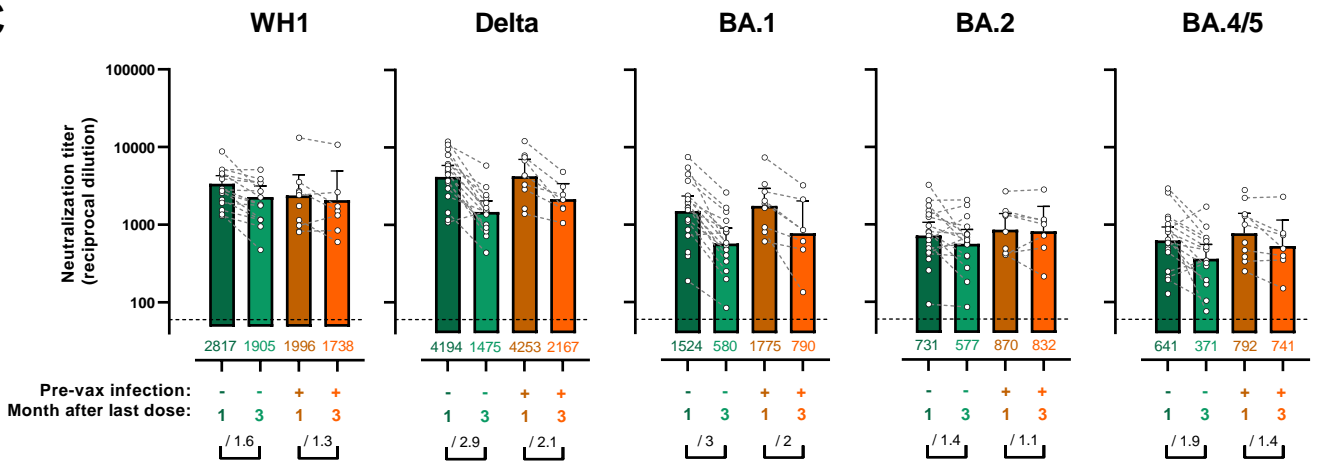

Figure S4. Additional stratified analyses and 3 months follow up on participants who received a booster vaccines (related to Figure 2).

A/B. Reanalyses of Figure 2B and C, respectively, excluding participants who only received 1 dose as part of full vaccine schedule.

C. Follow-up neutralization titers about 1 month (=Figure 2B) and 3 month after booster vaccine.

Figure S5

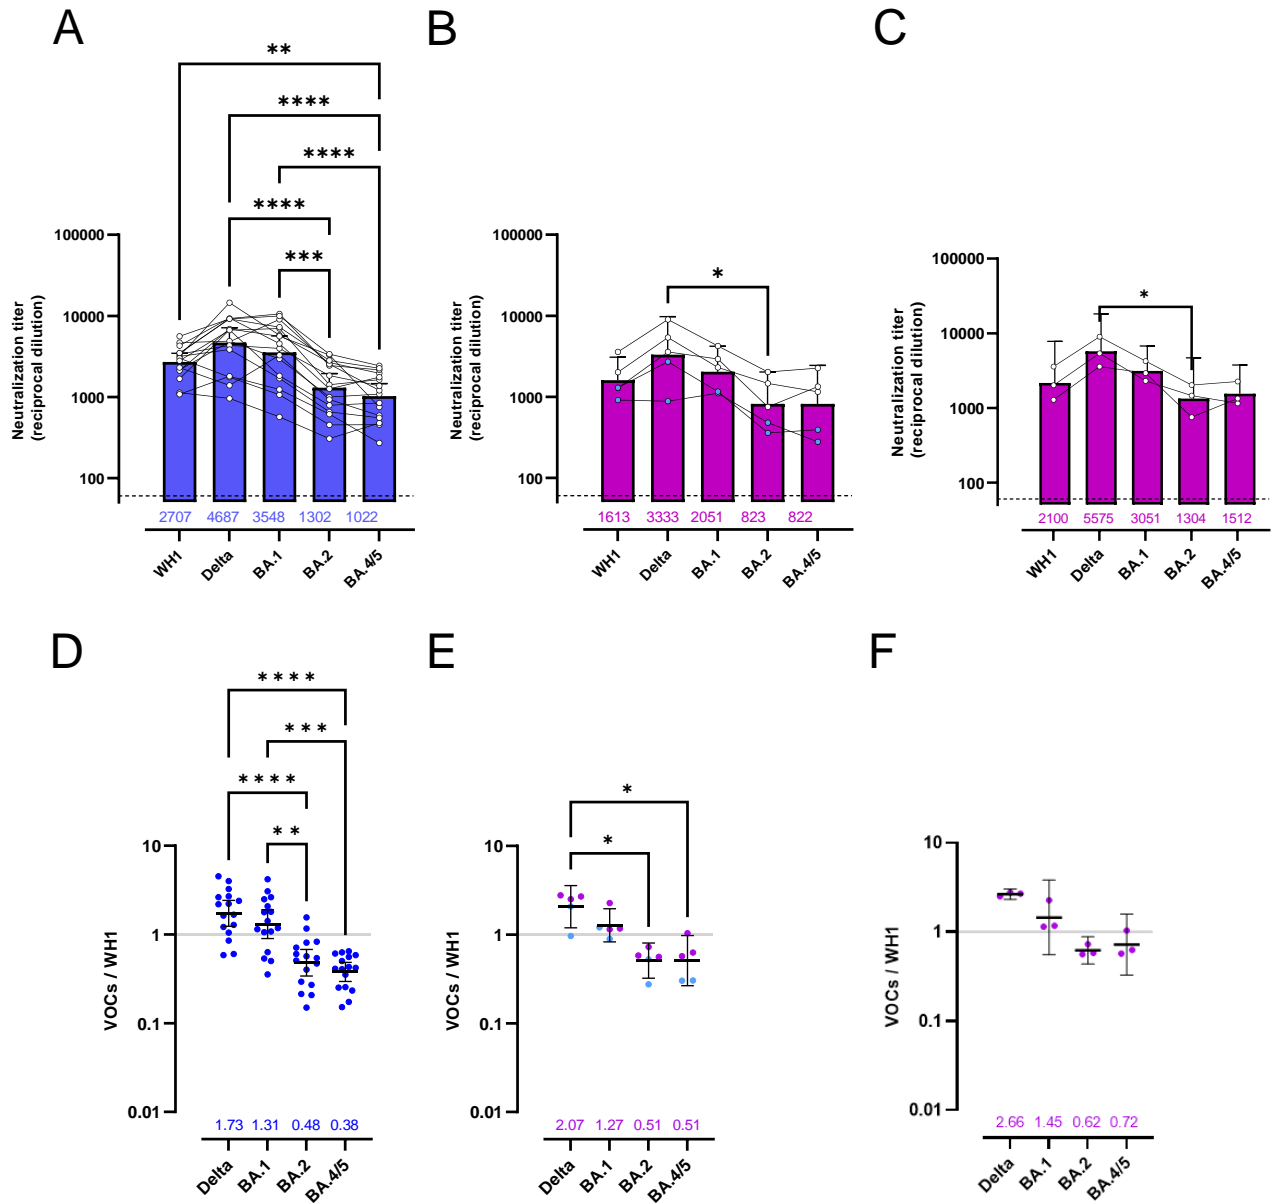

**Figure S5. Direct comparison of variants neutralizing titers and ratios within -/3/+ and +/3/+ groups (related to Figure 3).**

**A/B/C.** raw ID<sub>50</sub> (reciprocal dilutions) titers against the indicated variant spikes for -/3/+ (A.) and +/3/+ (B.) participants. **C.** is a reanalysis of B. excluding participants who received only 1 dose as part of full vaccine schedule (highlighted in blue in B.). Horizontal bars and numbers indicate ID<sub>50</sub> geometric means (GMT) for each variant and error bars indicate 95% confidence intervals. At the bottom are fold changes for the indicated comparisons. Significant *p* values are indicated for comparisons between all variants (Friedman test with Dunn's multiple comparison, \* *p* < 0.05, \*\* *p* < 0.01, \*\*\* *p* < 0.001, \*\*\*\* *p* < 0.0001). Dashed lines indicate the assay lower limit of detection (60 reciprocal dilutions).

**D/E/F.** Ratio of WH1 ID<sub>50</sub> over the indicated VOC ID<sub>50</sub> calculated for spikes for -/3/+ (D.) and +/3/+ (E.) participants. **F.** is a reanalysis of E. excluding participants who received only 1 dose as part of full vaccine schedule (highlighted in blue in E.). Horizontal bars indicate ratio geometric means for each variant and error bars indicate 95% confidence intervals. Bottom numbers indicate fold reduction compared to WH1. Significant *p* values are indicated for comparisons between all variants (Friedman test with Dunn's multiple comparison, \* *p* < 0.05, \*\* *p* < 0.01, \*\*\* *p* < 0.001, \*\*\*\* *p* < 0.0001)

Figure S6

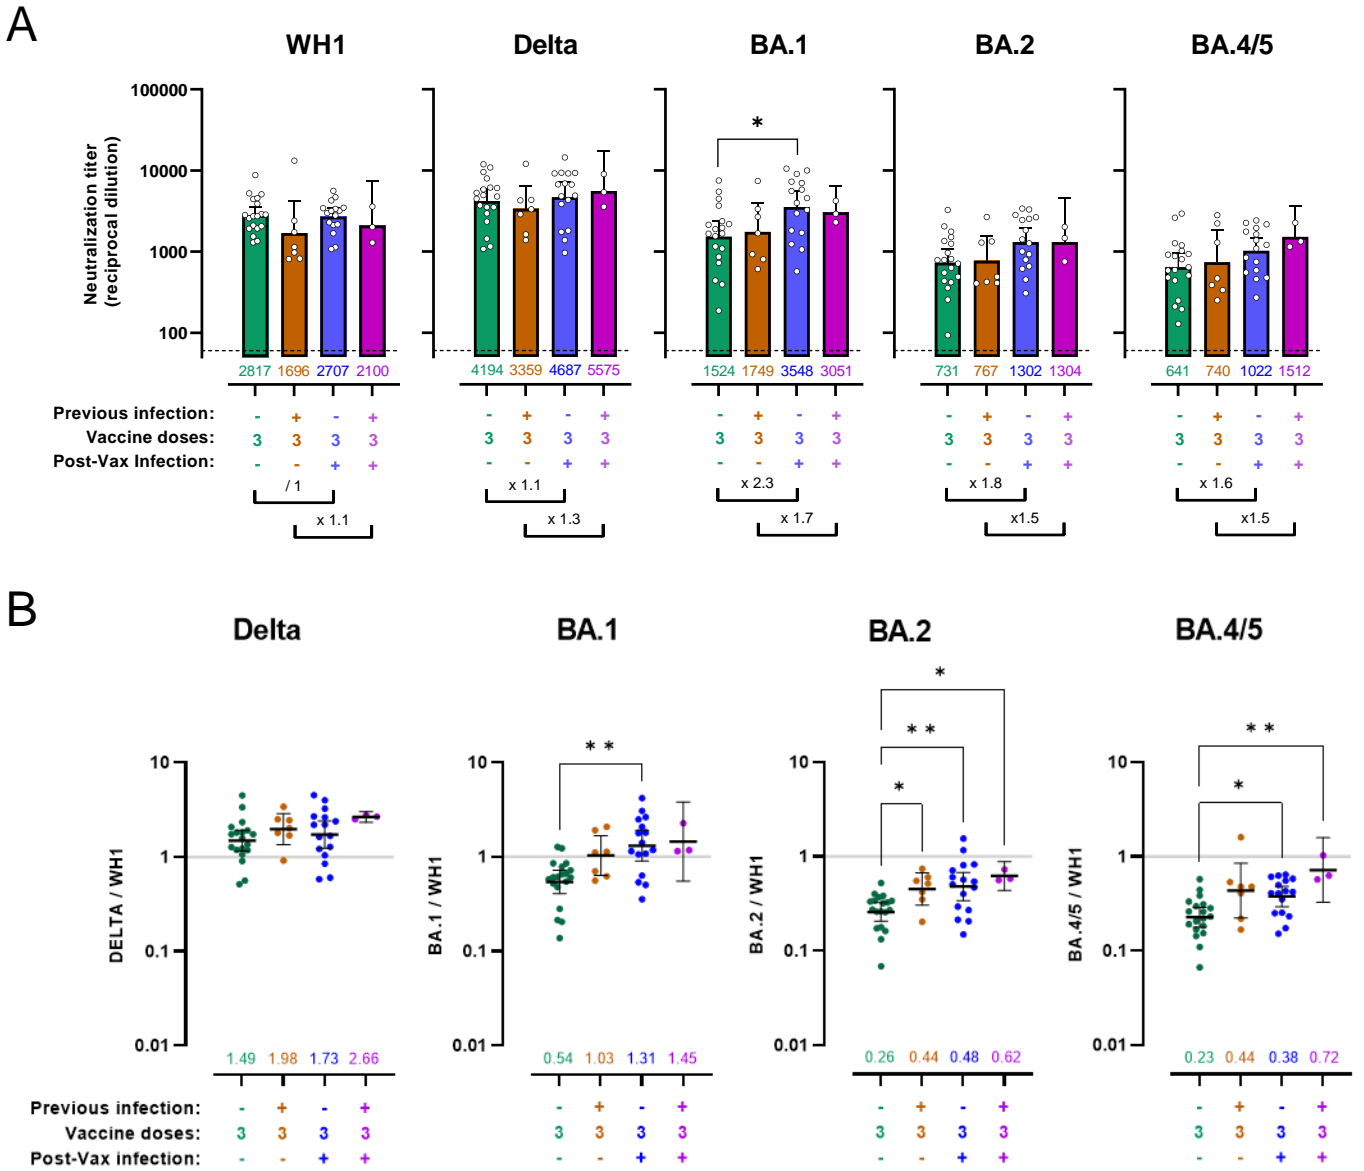

**Figure S6. Additional stratified analyses (related to Figure 3).**

**A/B.** Reanalyses of Figure 3B and 3C, respectively, excluding participants who only received 1 dose as part of full vaccine schedule.
